# Supplementary material
Source: PubMed Central journal article supplement (PMC4678834)
Supplement: supp_gkv1267_nar-02661-n-2015-File008.pdf [file supp_gkv1267_nar-02661-n-2015-File008.pdf]

Supplementary Table 1. Shared features of SMODS-related families in the DNA polymerase Beta superfamily.

| DNA pol $\beta$ family | protein (pdb id)          | pocket description         | $\beta$ -spine present?                | K/R1 <sup>1</sup> | K/R2 <sup>1</sup> | K active site <sup>1</sup> | comments                                                |
|------------------------|---------------------------|----------------------------|----------------------------------------|-------------------|-------------------|----------------------------|---------------------------------------------------------|
| mab-21/cGAS-like       | cGAS (4O6A)               | deep, formed by dimer      | yes                                    | K                 | R                 | K                          | Zinc thumb upstream of lysines                          |
|                        | MID51 (4OAF)              | deep, formed by dimer      | yes                                    | --                | K                 | K                          | inactive, binds ADP in active site pocket               |
|                        | MID49 (4WOY)              | shallow                    | yes                                    | --                | --                | --                         | inactive                                                |
| OAS                    | OAS (4IG8)                | shallow                    | yes                                    | k                 | R                 | K                          | active                                                  |
| SMODS                  | DncV (4TY0)               | deep, formed by dimer      | yes, elongated                         | r                 | R                 | K                          | active                                                  |
| archaeal CCA-adding    | tRNA CCA-adding (2ZH1)    | shallow                    | yes                                    | --                | R                 | K                          | active                                                  |
| eukaryotic PAP         | poly(A) polymerase (1Q79) | shallow                    | yes, elongated                         | r                 | R                 | K                          | active                                                  |
| NF45/NF90/DZF          | NF45 (4AT8A)              | deep, formed by tetramer   | yes                                    | k                 | R                 | K                          | inactive, binds NTP                                     |
|                        | NF90 (4AT8B)              | shallow                    | yes                                    | --                | R                 | R                          | no ligand reported although residues for binding remain |
| classic TRF            | TUT7/TUT4 (4FHP)          | shallow                    | yes                                    | r                 | --                | K                          | active                                                  |
|                        | MTPAP (3PQ1)              | deep, formed by RRM fusion | yes, occluded by N-terminal RRM domain | R                 | --                | R                          | active                                                  |
|                        | RET1 (2IKF)               | none                       | yes                                    | R                 | --                | K                          | active                                                  |
|                        | TRF4 (3NYB)               | shallow                    | yes                                    | --                | --                | K                          | active                                                  |
| NRAP                   | NRAP-N (4M5DA)            | none                       | yes, elongated N-terminal segment      | --                | --                | k                          | inactive, no ligand reported                            |
|                        | NRAP-C (4M5DA)            | none                       | yes, distorted                         | --                | R                 | K                          | inactive, no ligand reported                            |

Footnotes:

<sup>1</sup>Presence/absence of key conserved lysine/arginine residues are shown. Upper-case "R" (arginine) or "K" (lysine) indicates absolute conservation across the family/subfamily including the protein listed in column 2, lower-case indicates partial conservation. "--" indicates absence of the residue.
