# Supplementary material
Source: PubMed Central journal article supplement (PMC4678834)

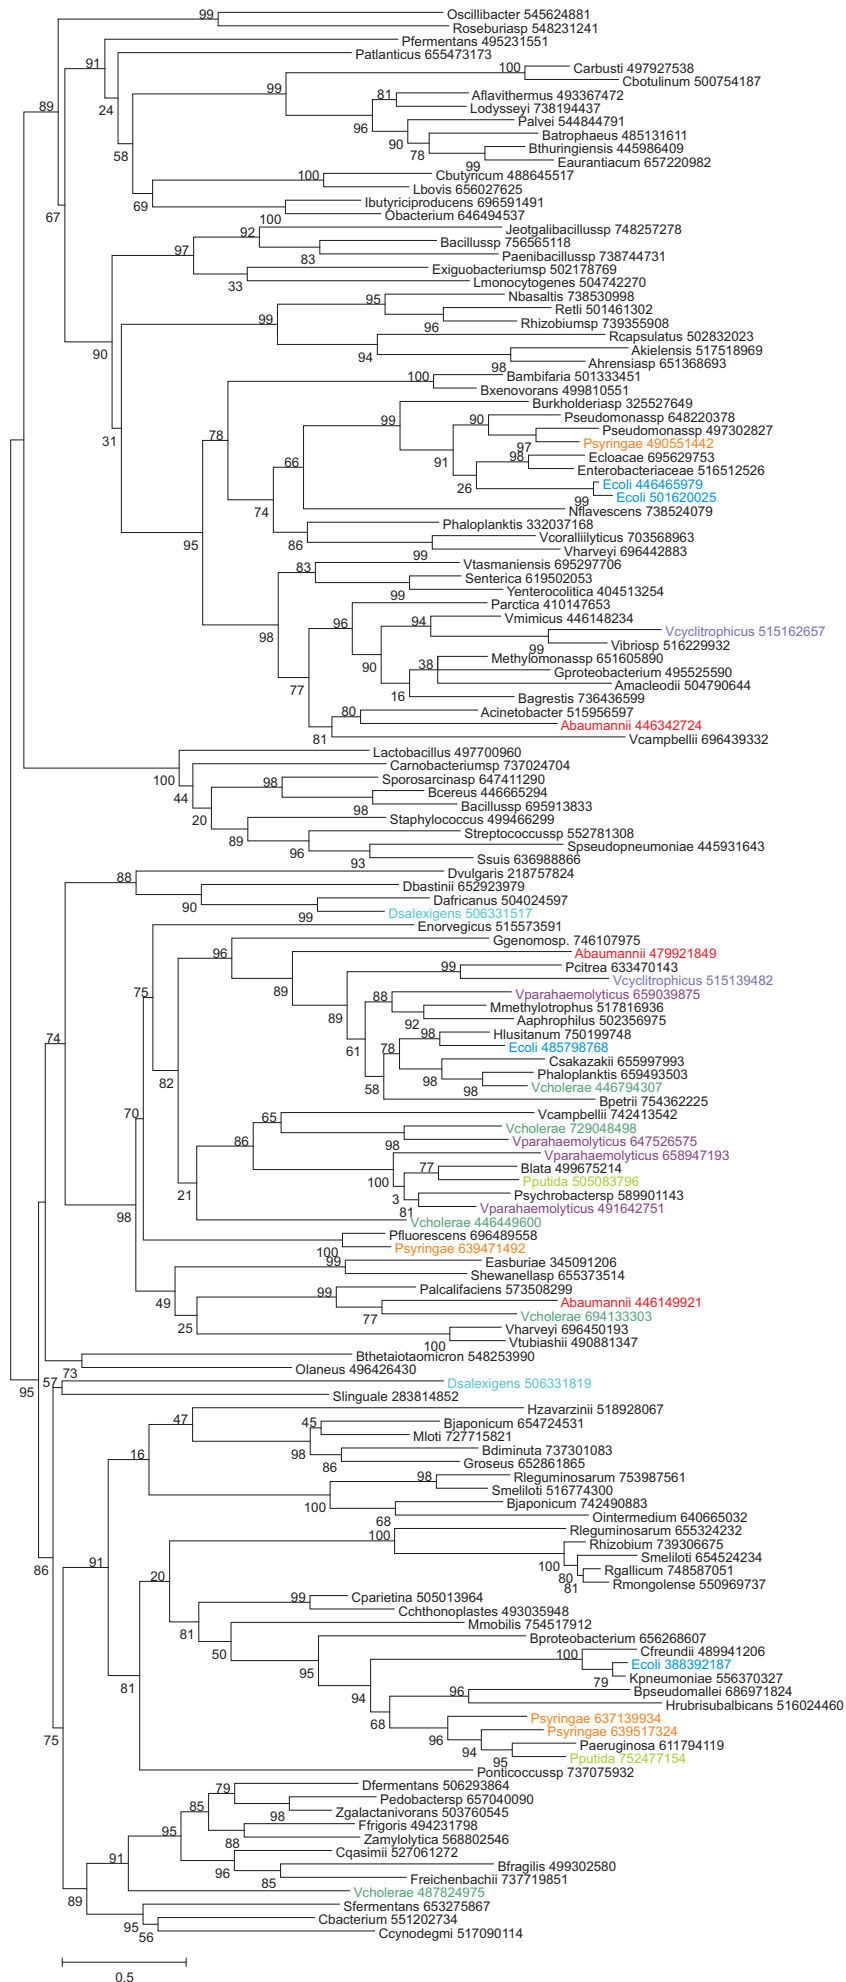

Supplement: supp_gkv1267_nar-02661-n-2015-File009.pdf [file supp_gkv1267_nar-02661-n-2015-File009.pdf]
